# Supplementary material for: Factors influencing test porosity in planktonic foraminifera
Source: Copernicus journal article supplement (doi:10.5194/bg-15-6607-2018), 2018-11-07
Supplement: Supplementary file 8 [file bg-15-6607-2018-supplement.zip]

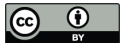

## *Supplement of*

# **Factors influencing test porosity in planktonic foraminifera**

**Janet E. Burke et al.**

*Correspondence to:* Janet E. Burke ([janet.burke@yale.edu](mailto:janet.burke@yale.edu))

- bg-15-6607-2018-supplement-title-page.pdf
- Burke\_et\_al\_Porosity\_Supplement
  - .DS\_Store
  - S1\_Supplemental\_Text.docx
  - S2\_Figures
    - \* .DS\_Store
    - \* S2\_SFigure\_Captions.docx
    - \* SFigure\_01.pdf
    - \* SFigure\_02.pdf
    - \* SFigure\_03a.pdf
    - \* SFigure\_03b.pdf
    - \* SFigure\_03c.pdf
    - \* SFigure\_04a.pdf
    - \* SFigure\_04b.pdf
    - \* SFigure\_04c.pdf
    - \* SFigure\_05.pdf
    - \* SFigure\_06.pdf
  - S3\_Data\_Tables.xlsx
  - S3\_Supplemental\_Data\_Table\_Captions.docx
- \_\_MACOSX
  - Burke\_et\_al\_Porosity\_Supplement
    - \* .DS\_Store
    - \* .S1\_Supplemental\_Text.docx
    - \* .S3\_Data\_Tables.xlsx
    - \* .S3\_Supplemental\_Data\_Table\_Captions.docx
    - \* S2\_Figures

The copyright of individual parts of the supplement might differ from the CC BY 4.0 License.
