# Supplementary figures and images for: Factors influencing test porosity in planktonic foraminifera
Source: Copernicus journal article supplement (doi:10.5194/bg-15-6607-2018), 2018-11-07

Supplementary Figure 6.

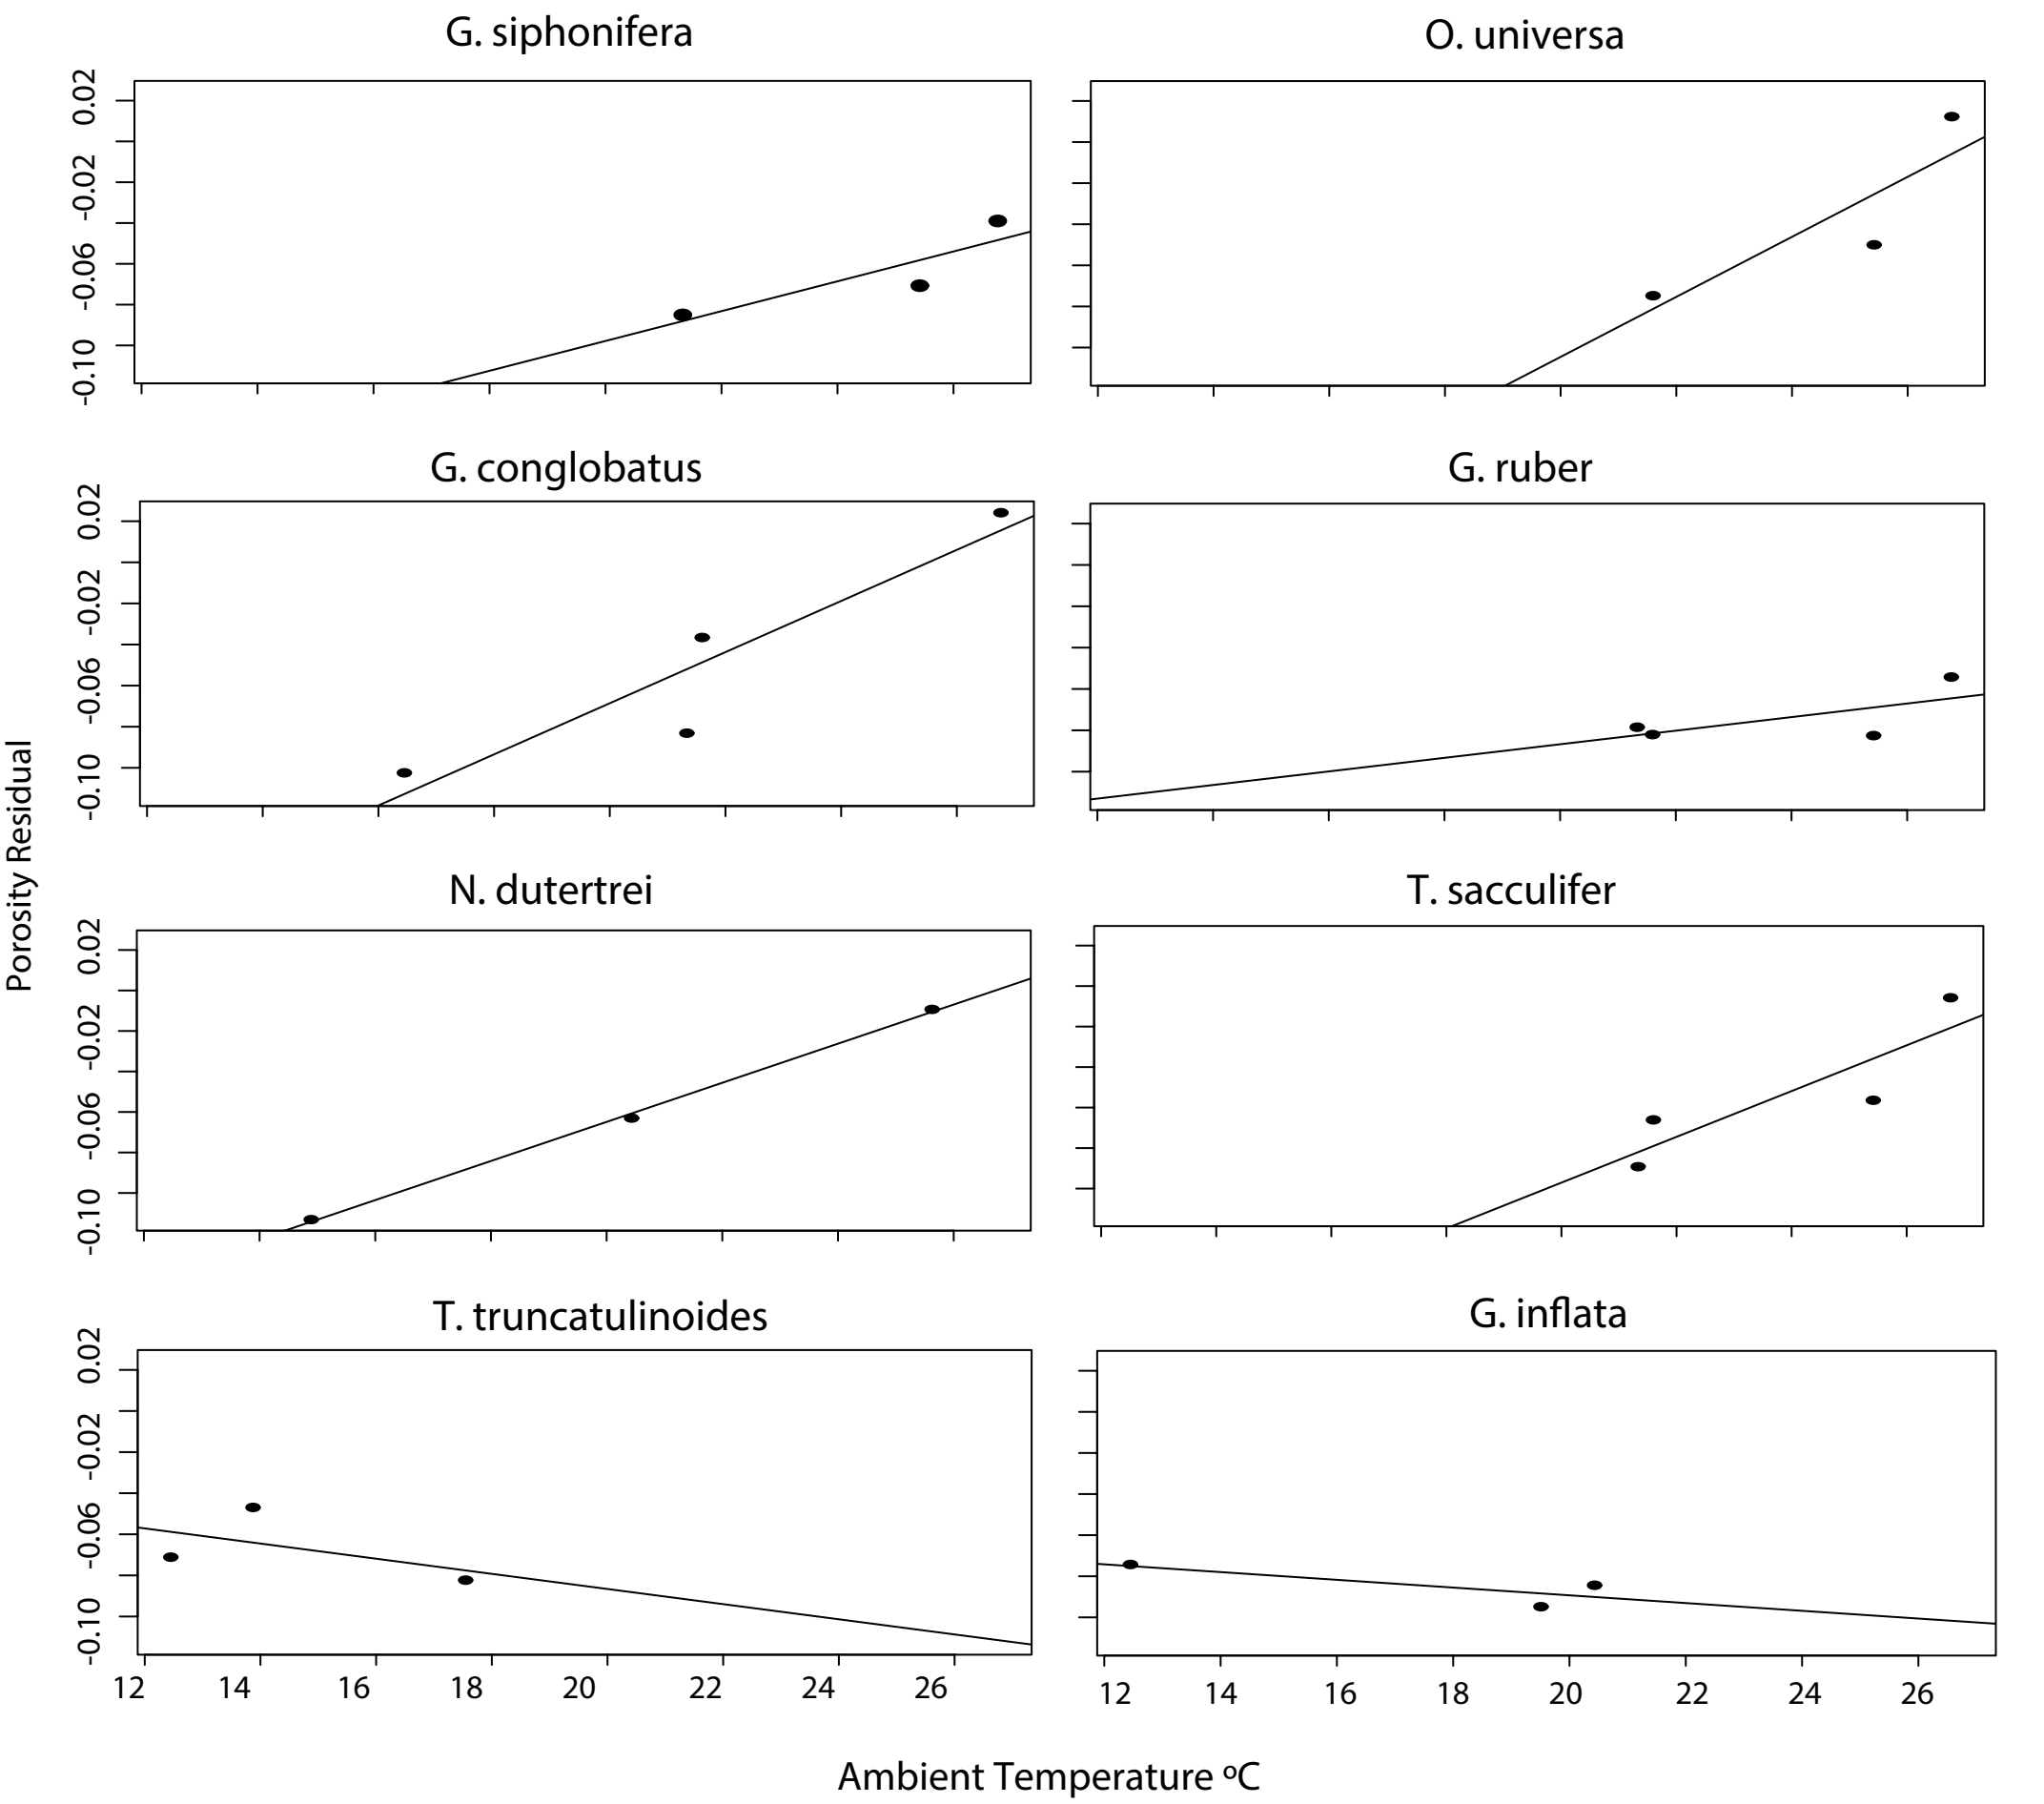

Supplement: Supplementary file 3 [file bg-15-6607-2018-supplement.zip]

Supplementary Figure 4c.

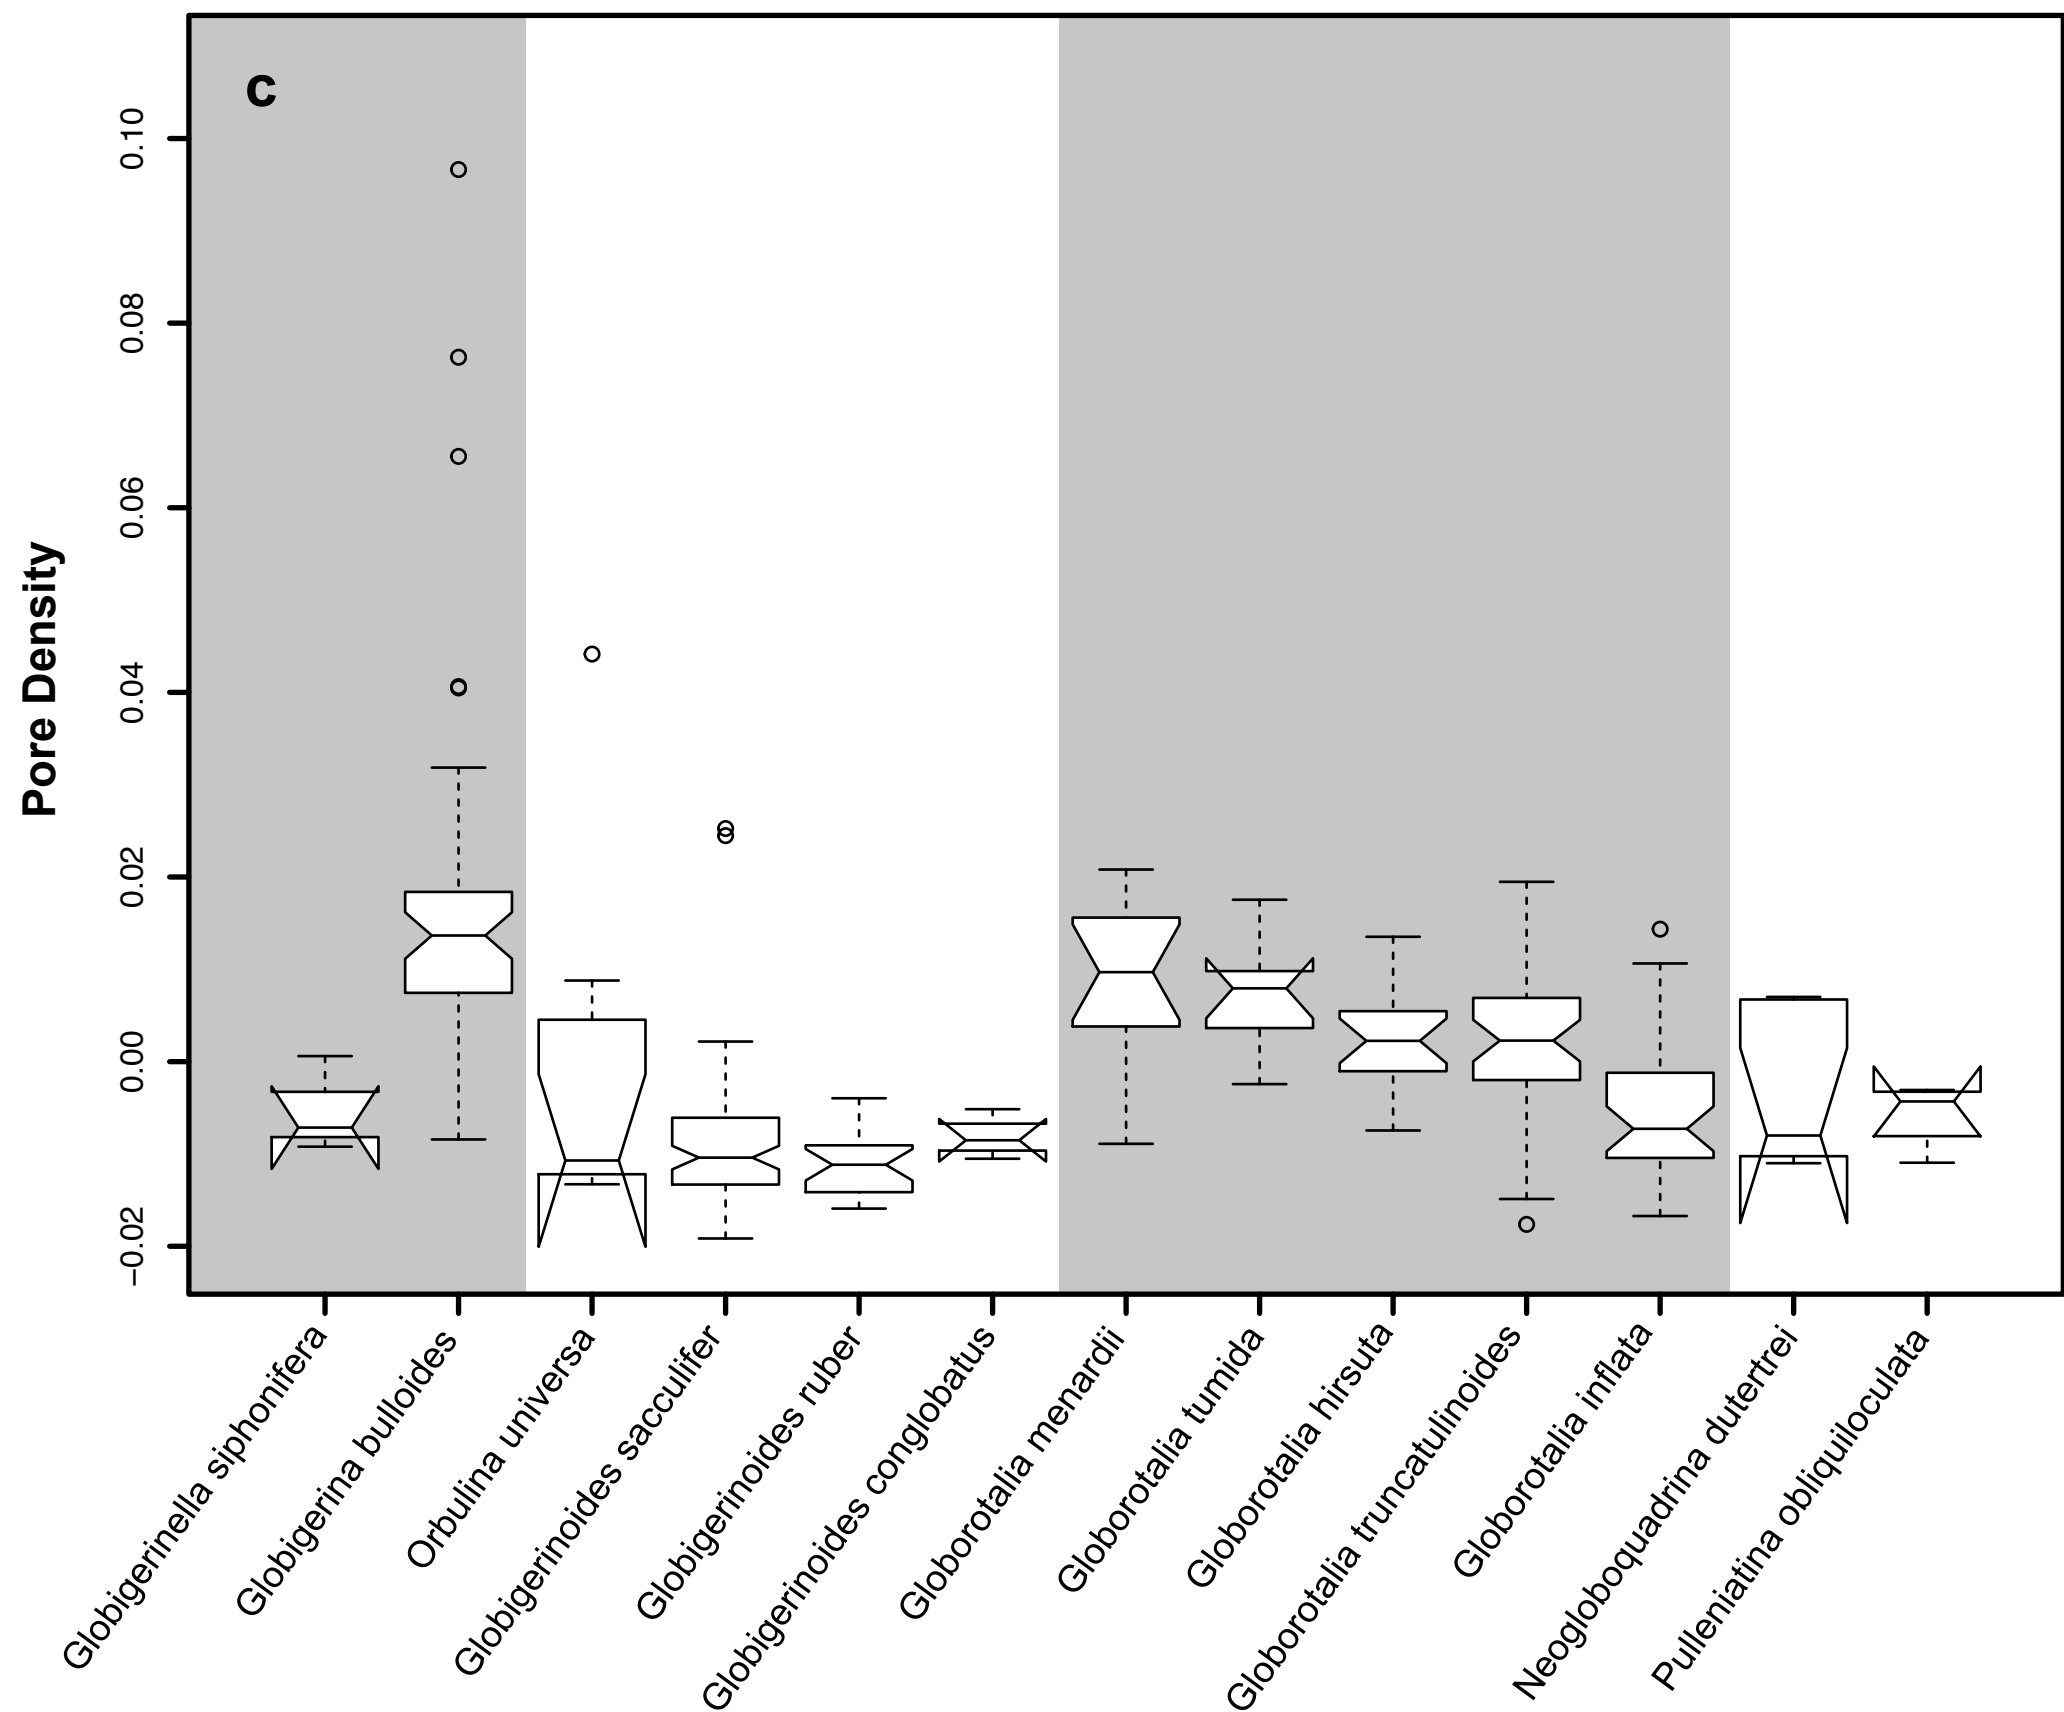

Supplement: Supplementary file 4 [file bg-15-6607-2018-supplement.zip]

Supplemental Figure 3b

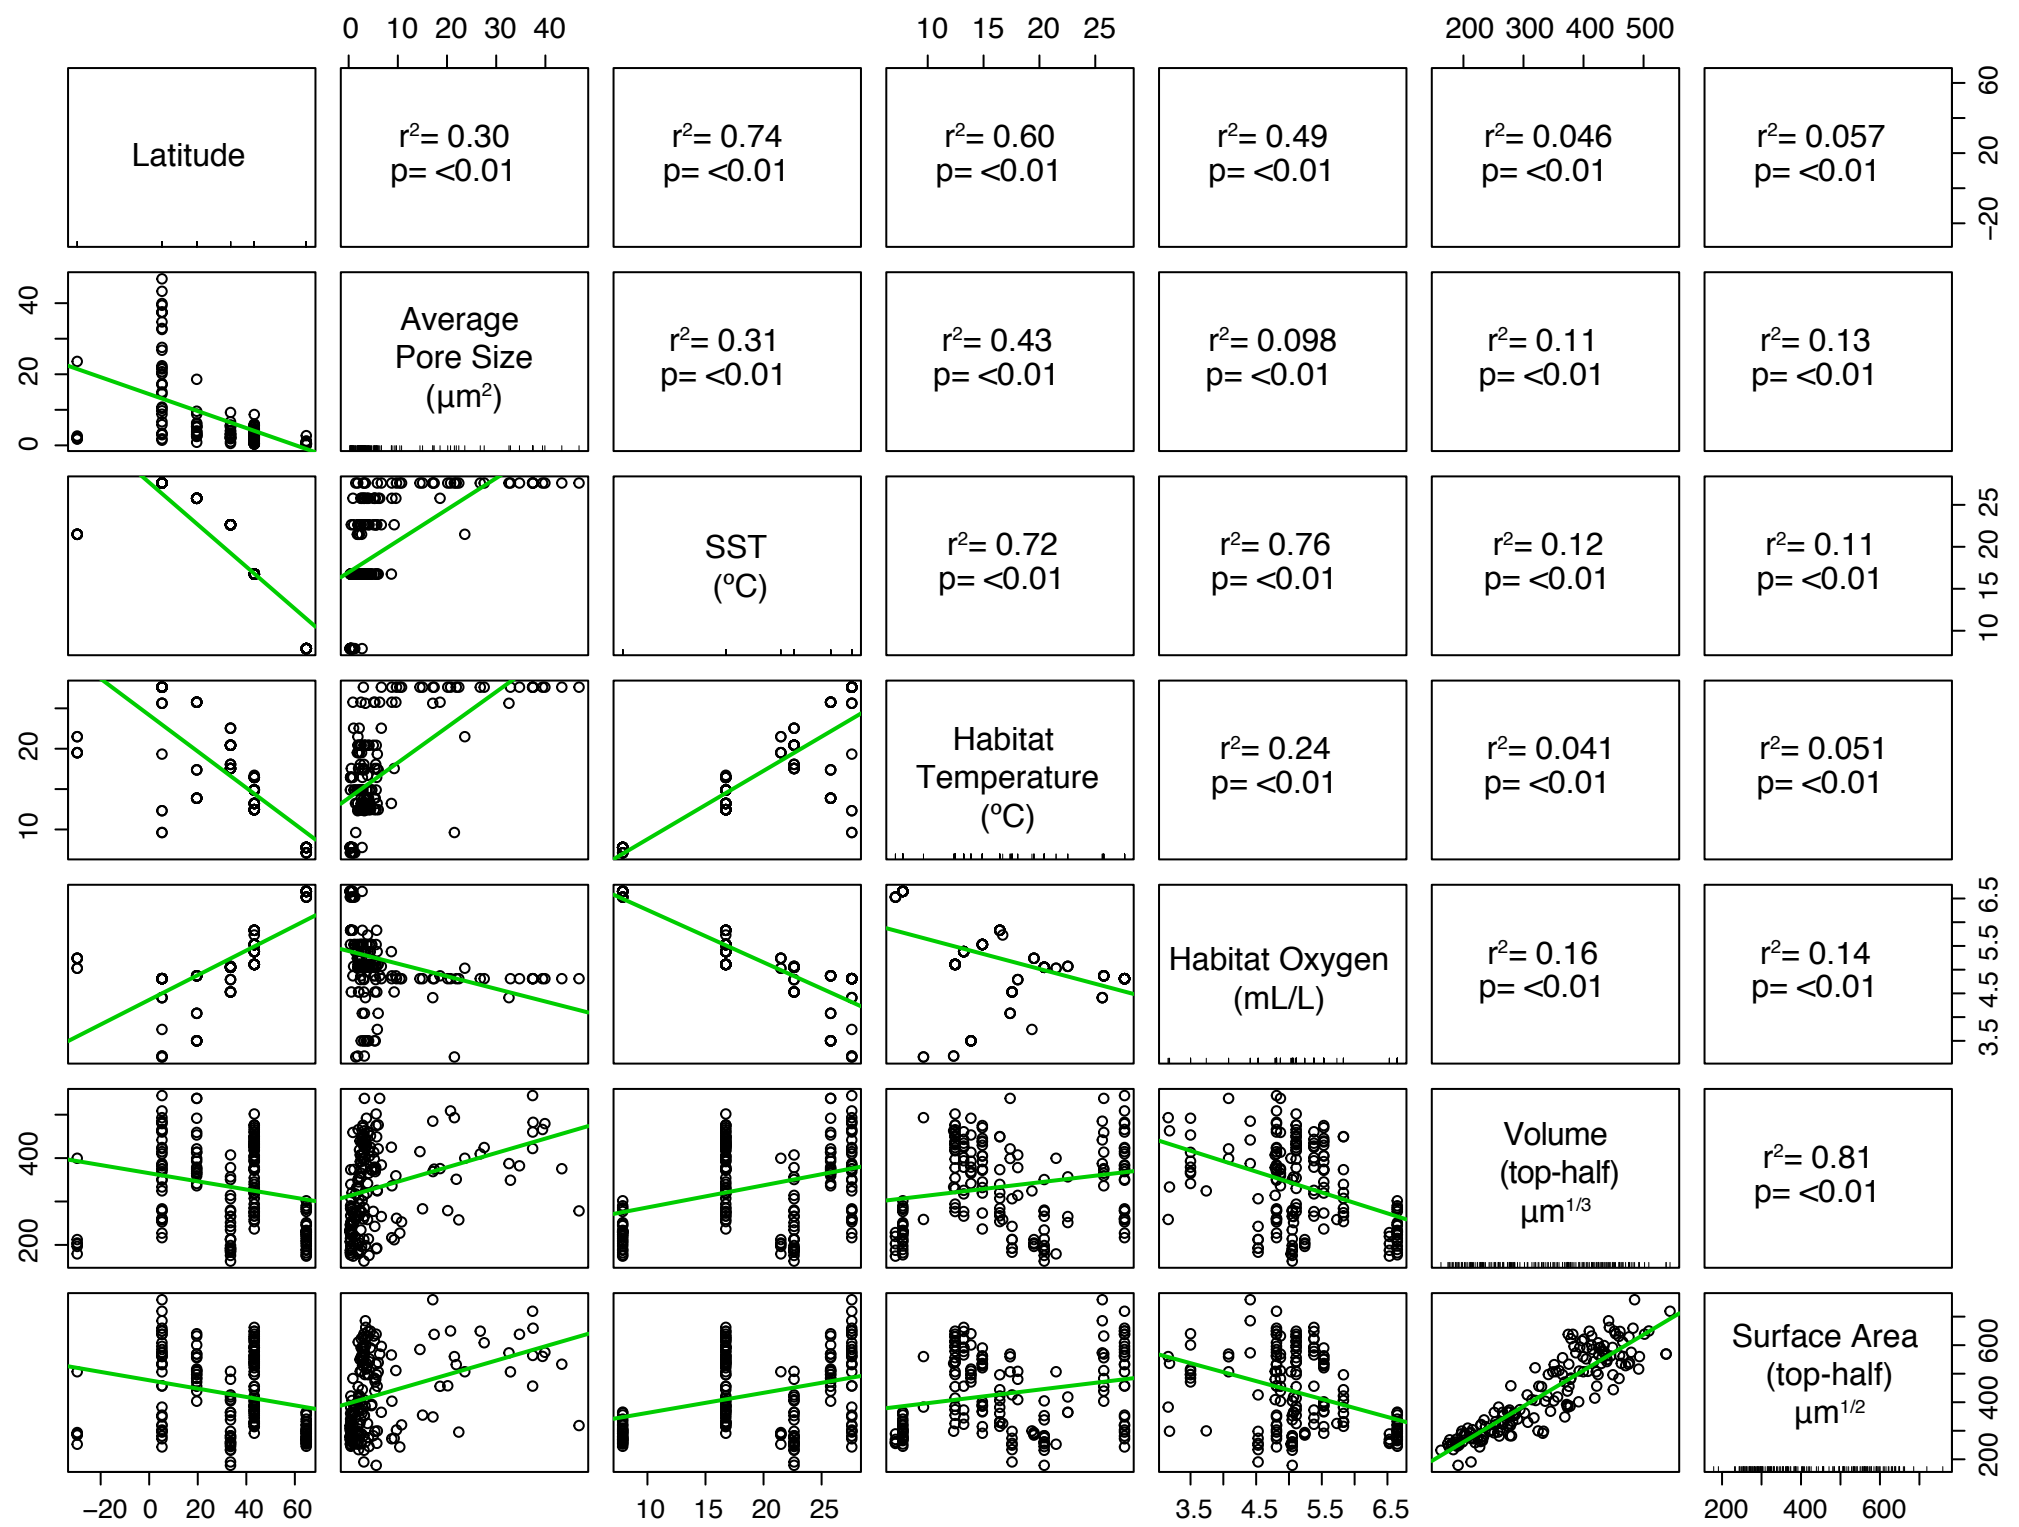

Supplement: Supplementary file 9 [file bg-15-6607-2018-supplement.zip]

Supplementary Figure 4.

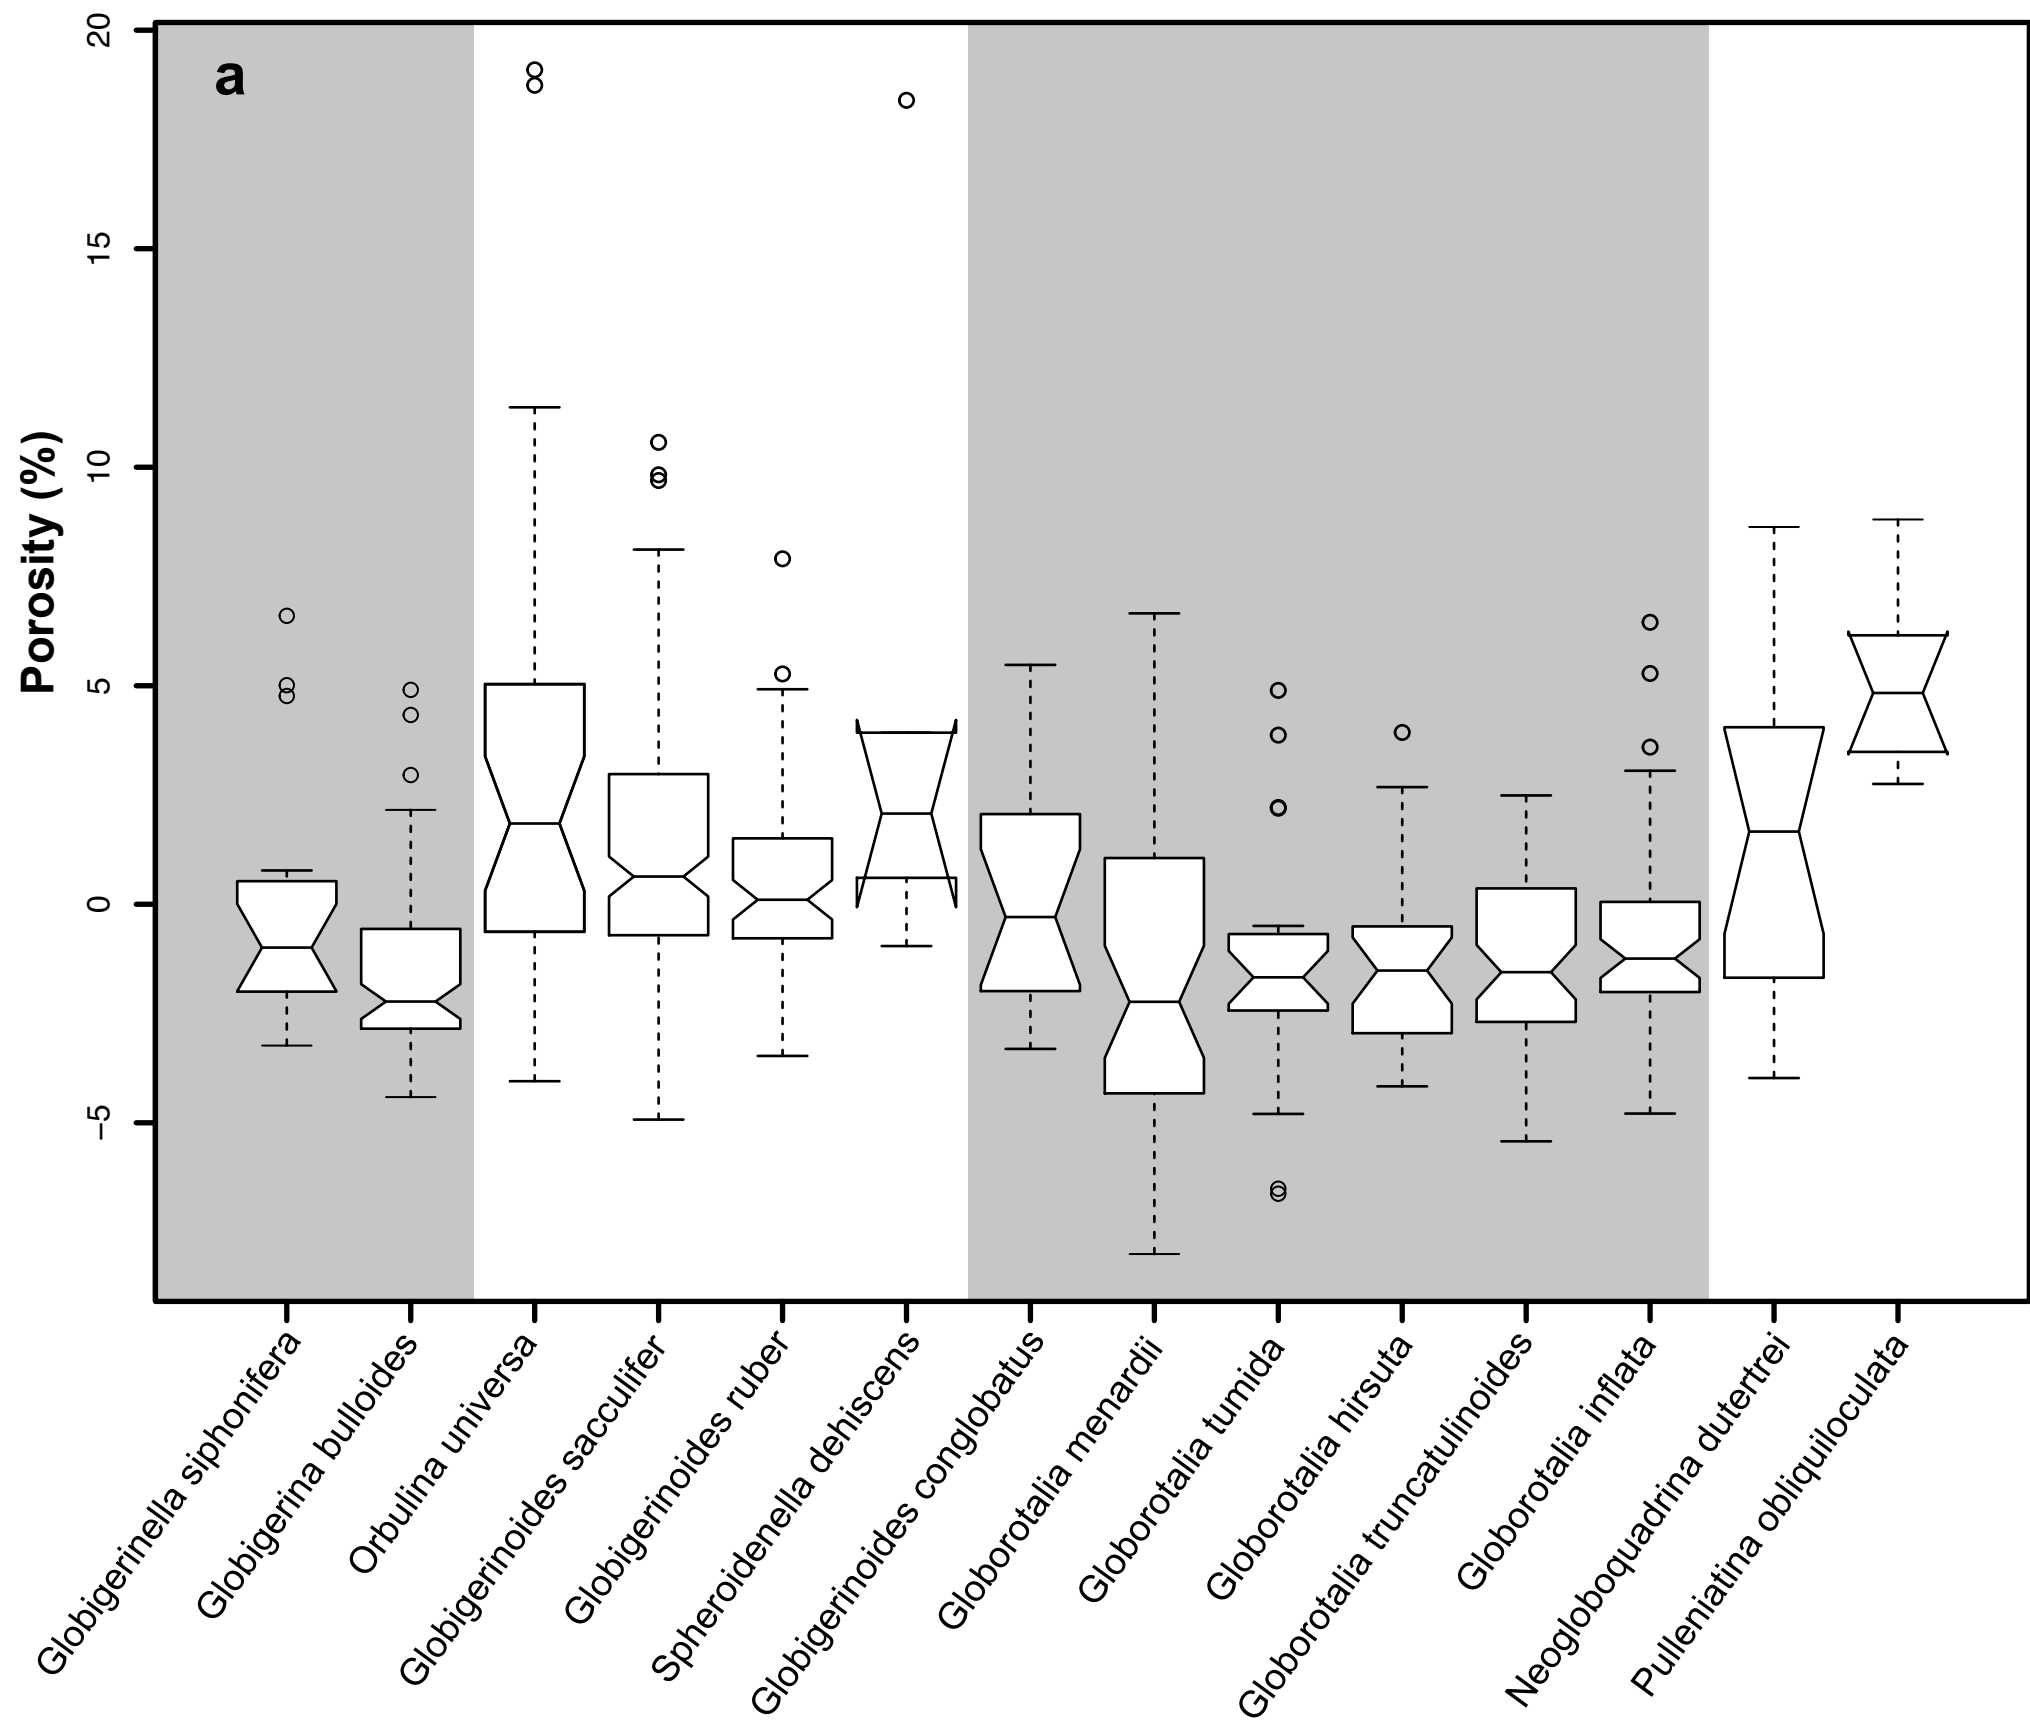

Supplement: Supplementary file 10 [file bg-15-6607-2018-supplement.zip]

Supplementary Figure 4b.

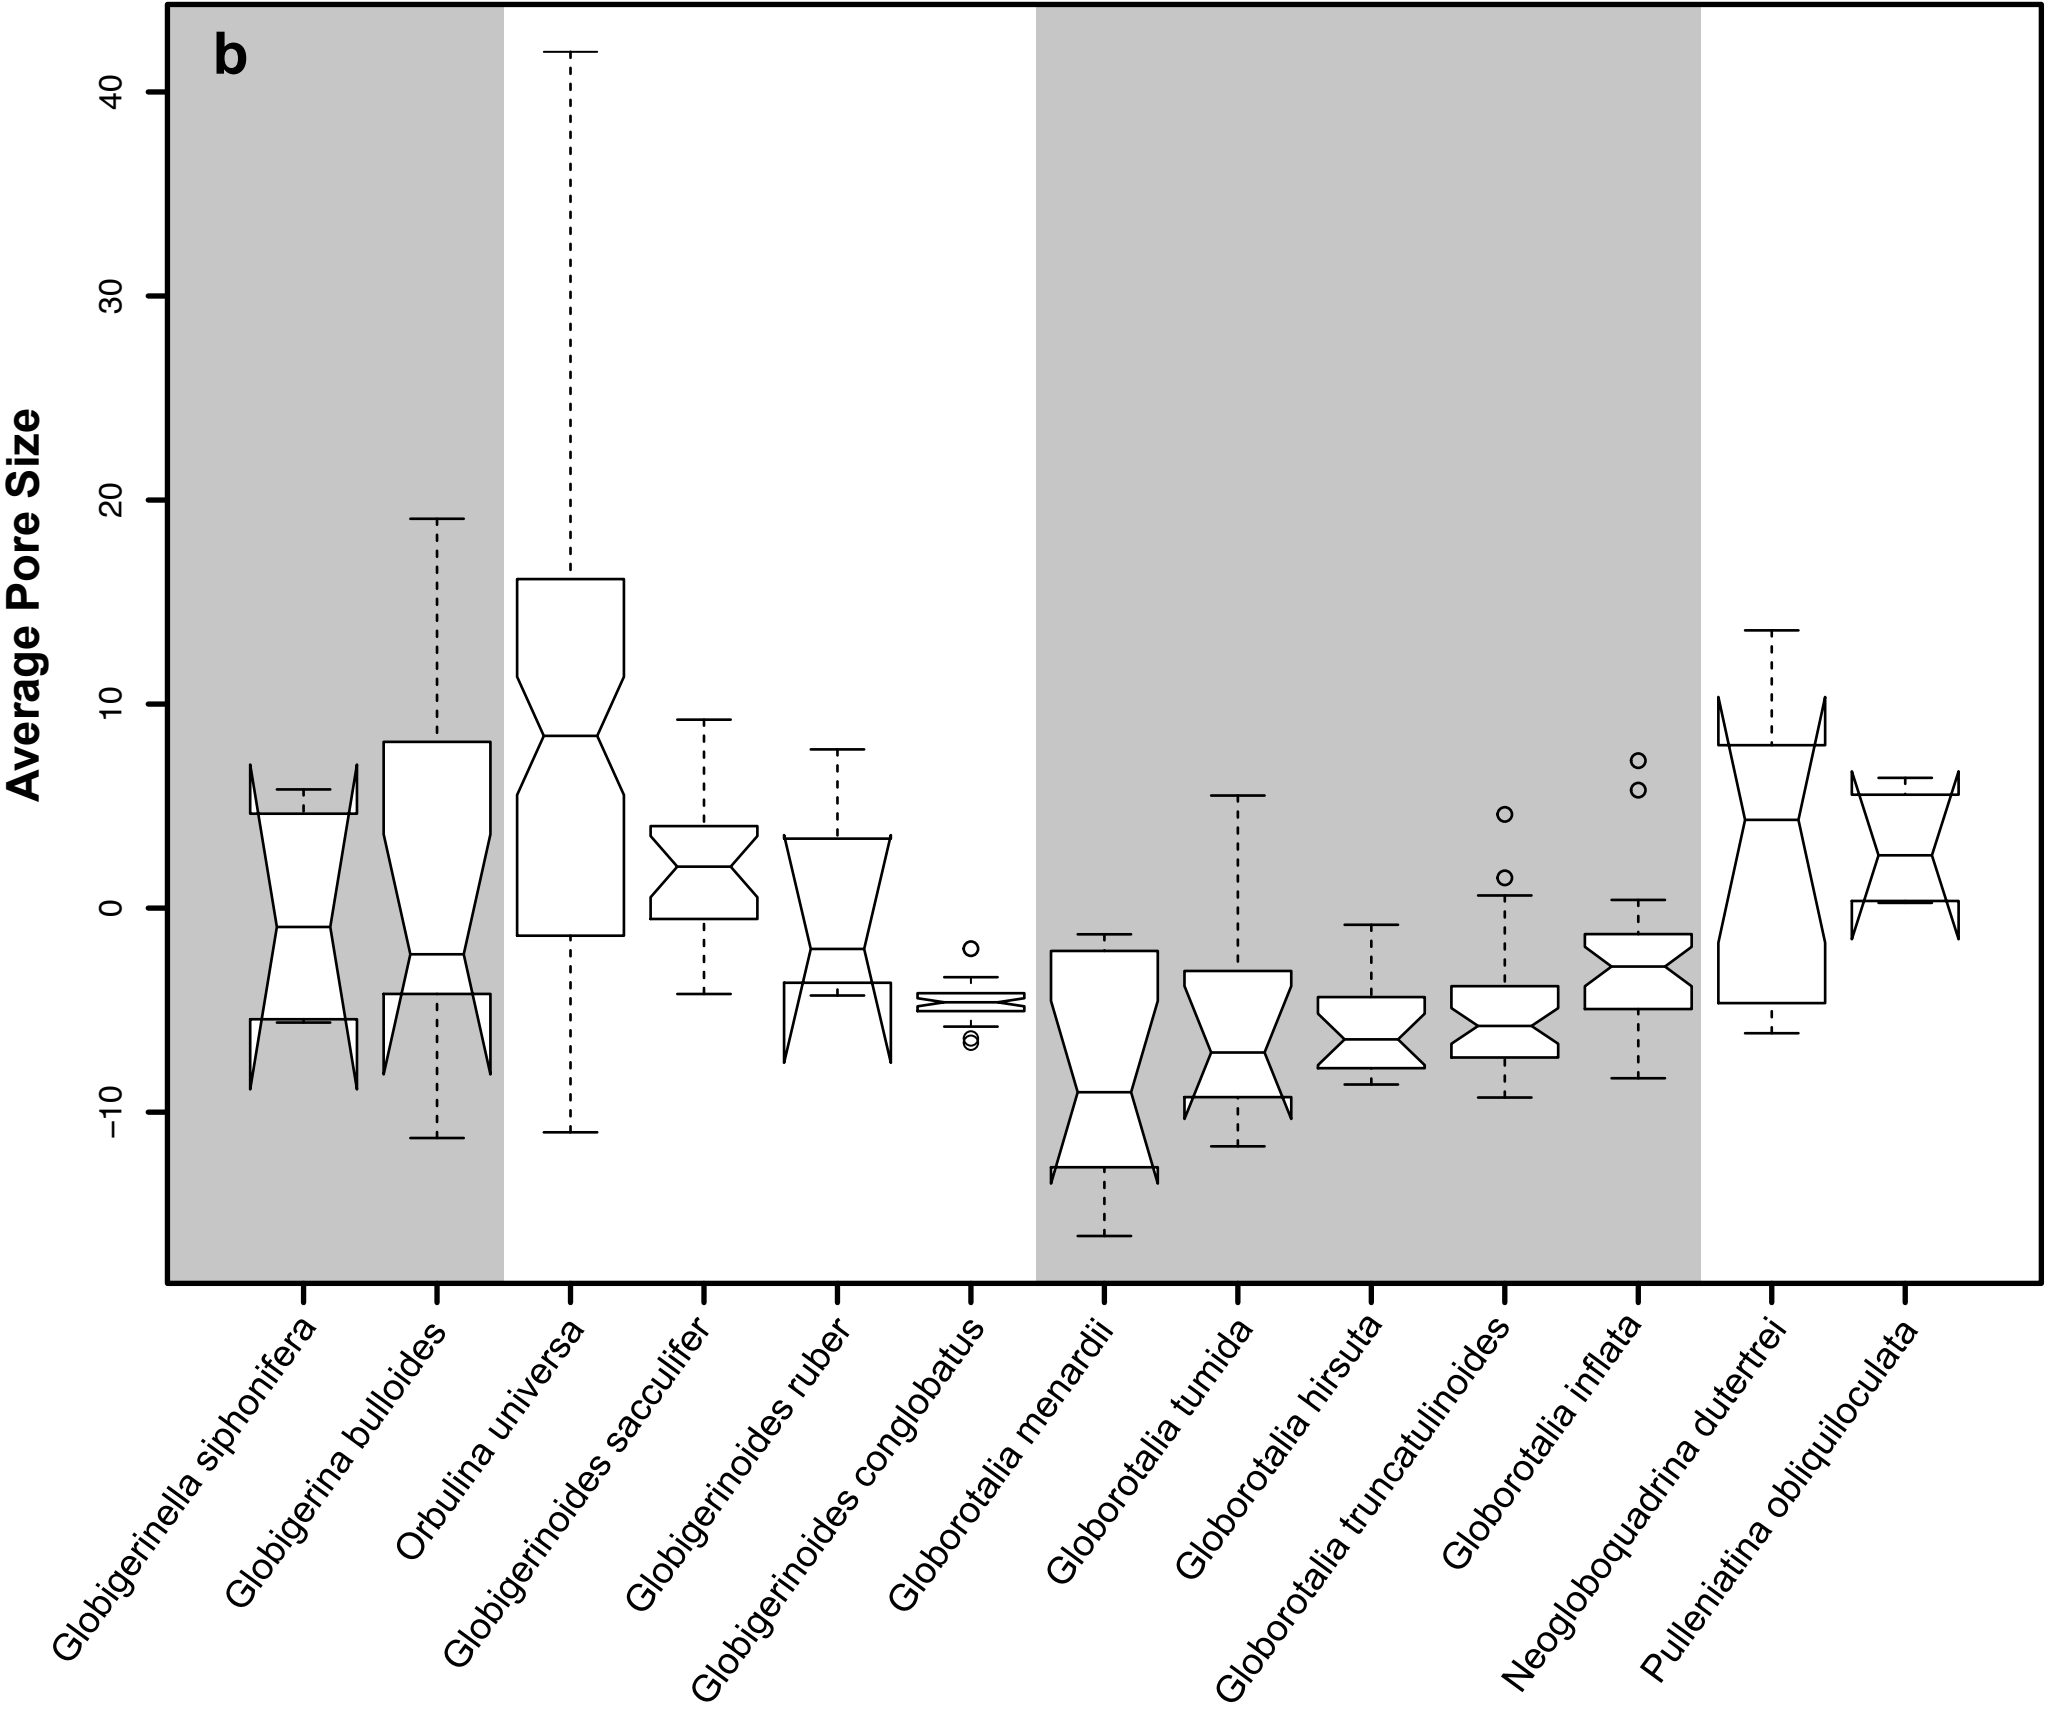

Supplement: Supplementary file 12 [file bg-15-6607-2018-supplement.zip]

Supplemental Figure 5.

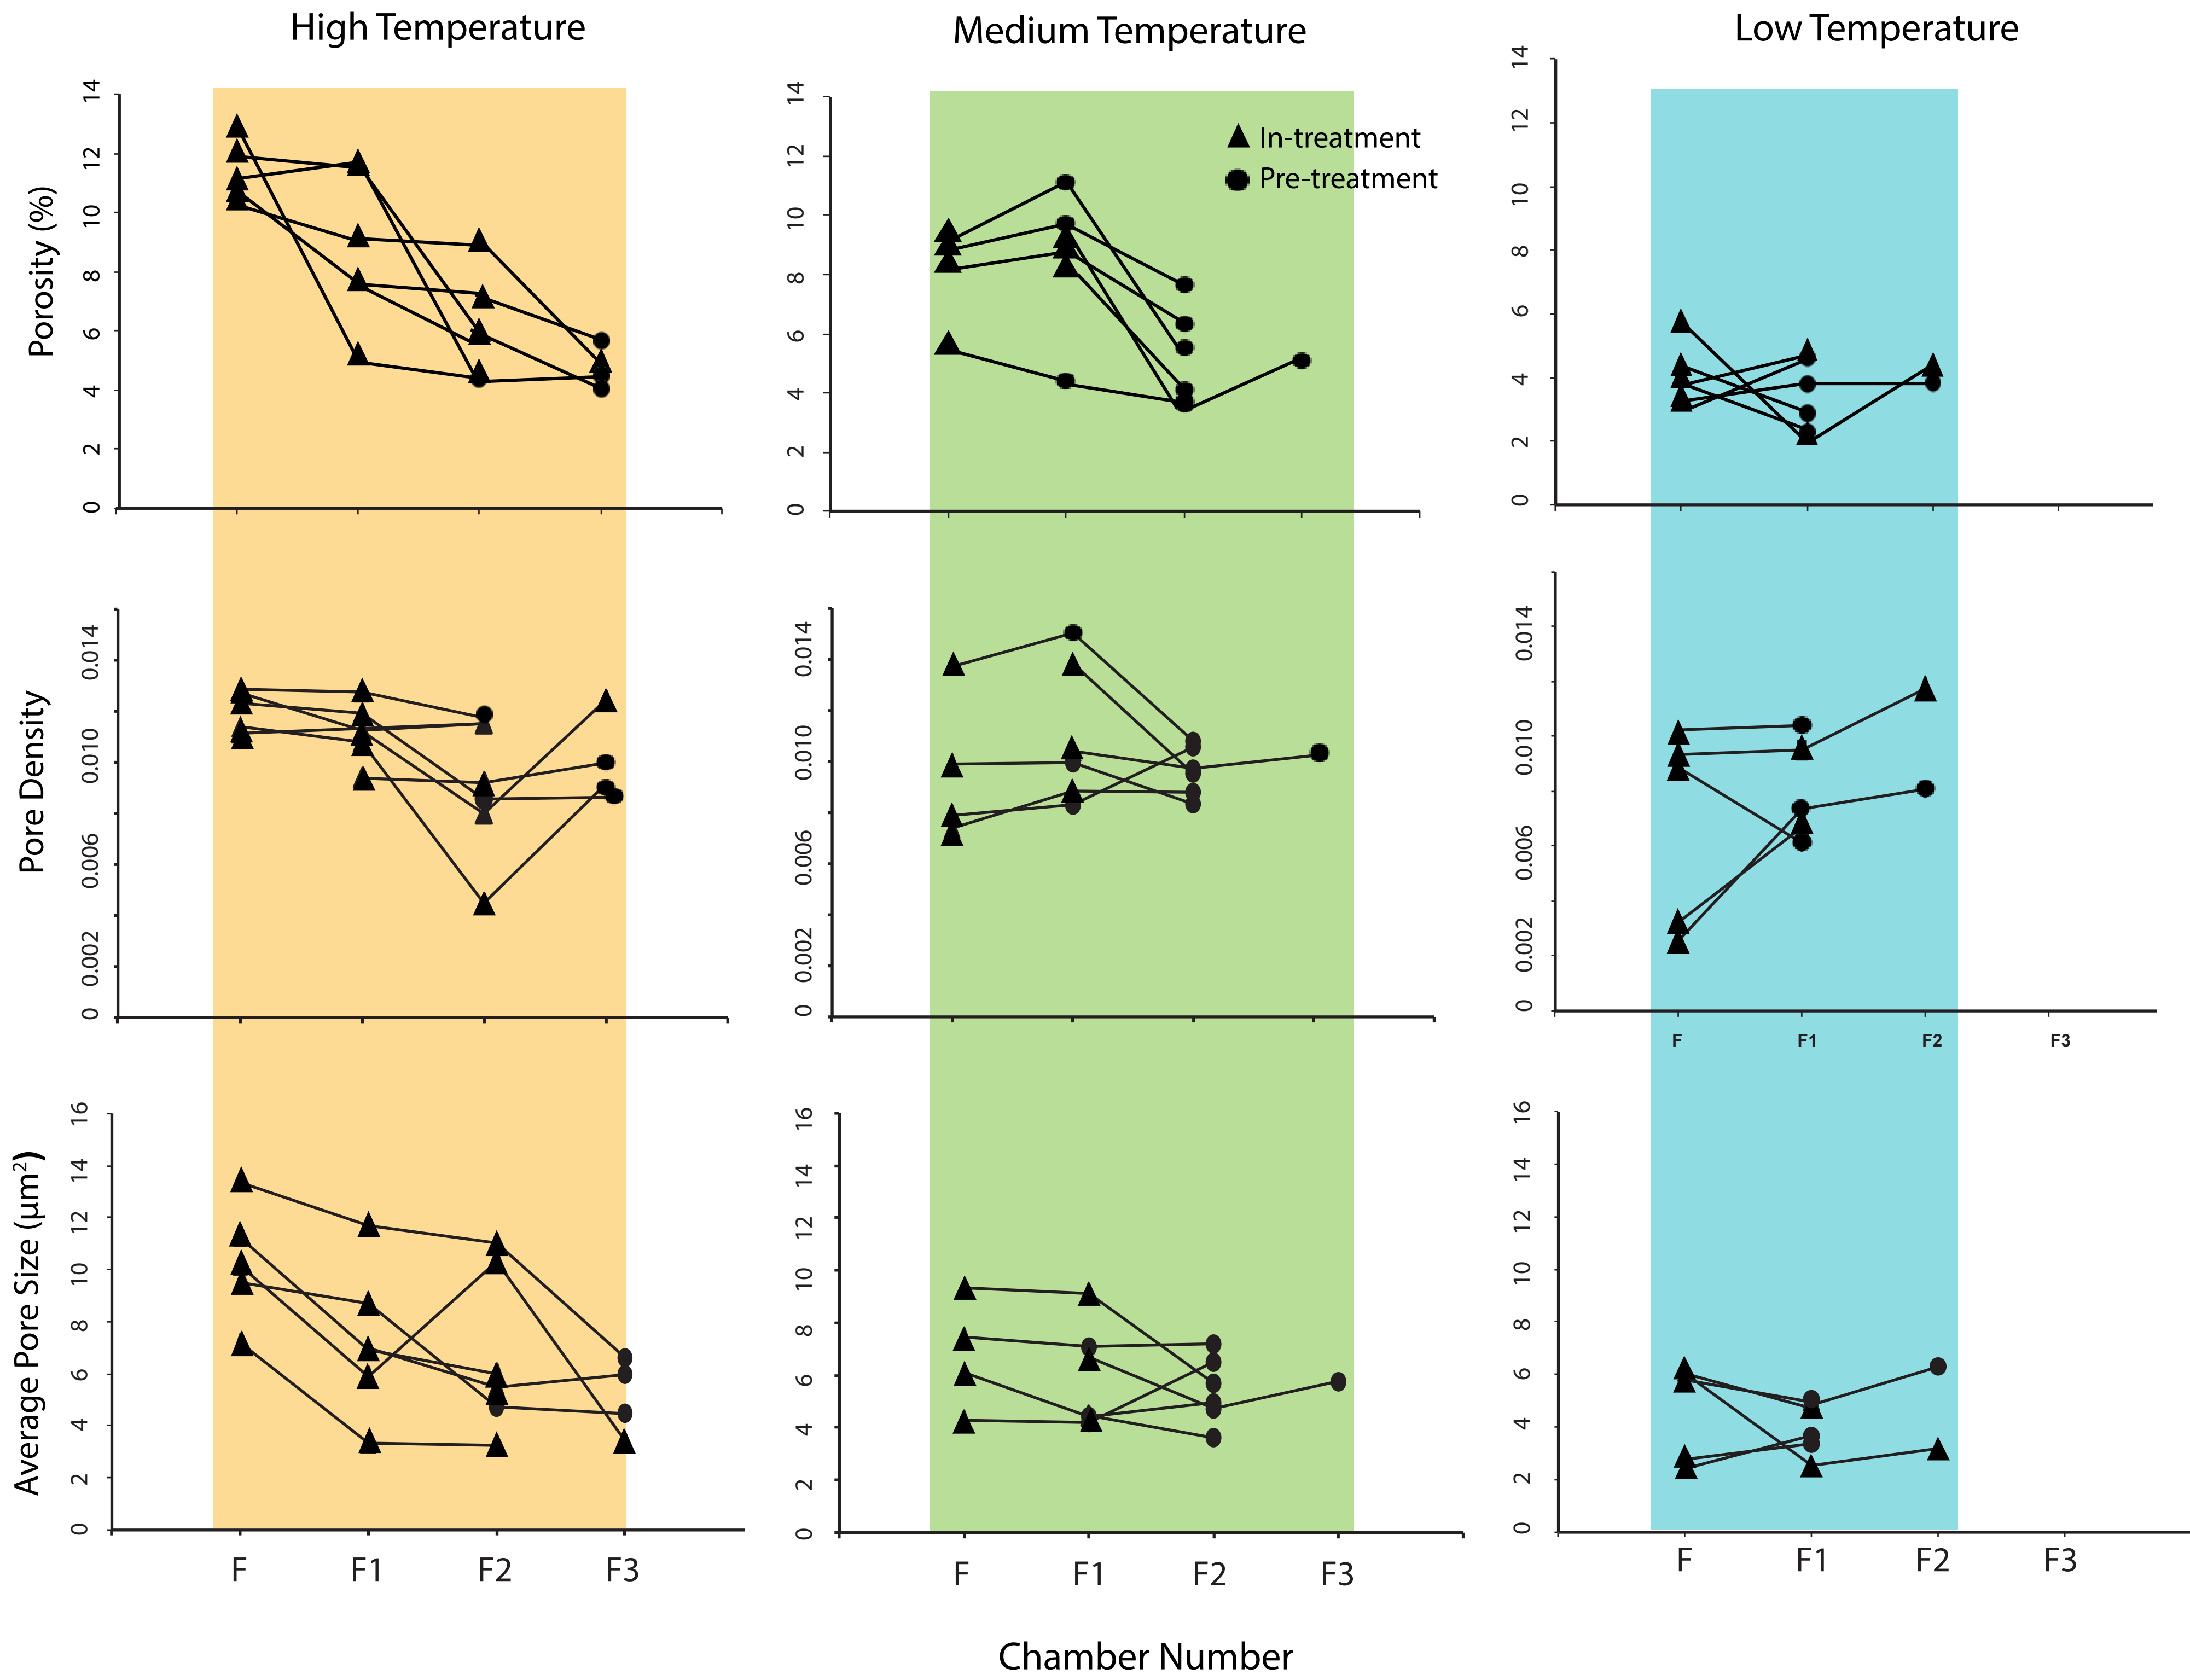

Supplement: Supplementary file 14 [file bg-15-6607-2018-supplement.zip]
